# Supplementary material for: Mg2+ Ions Regulating 3WJ-PRNA to Construct Controllable RNA Nanoparticle Drug Delivery Platforms
Source: MDPI journal article supplement (doi:10.3390/pharmaceutics14071413), 2022-07-06
Supplement: s1 [file s1]

## **Supporting Information**

# **Mg<sup>2+</sup> ions Regulating 3WJ-pRNA to Construct Controllable RNA Nanoparticle Drug Delivery Platforms**

Le Chen,<sup>1</sup> Jingyuan Li<sup>1,\*</sup>

<sup>1</sup> Zhejiang Province Key Laboratory of Quantum Technology and Device, School of Physics, Zhejiang University, Zheda Road 38, Hangzhou 310027, China;  
3180103853@zju.edu.cn (L.C.)

\* Correspondence: jingyuanli@zju.edu.cn

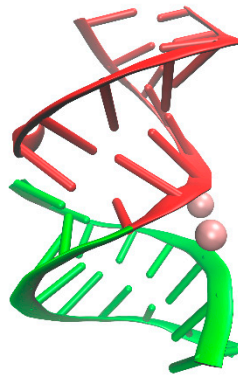

**Figure S1. The schematic representation of the helix 1 (H1) and helix 3 (H3) in the 3WJ-pRNA.** H1 (in red) and H3 (in green) are stacked coaxially and two pairs of bases bind  $\text{Mg}^{2+}$  ions to form two adjacent Mg clamps.

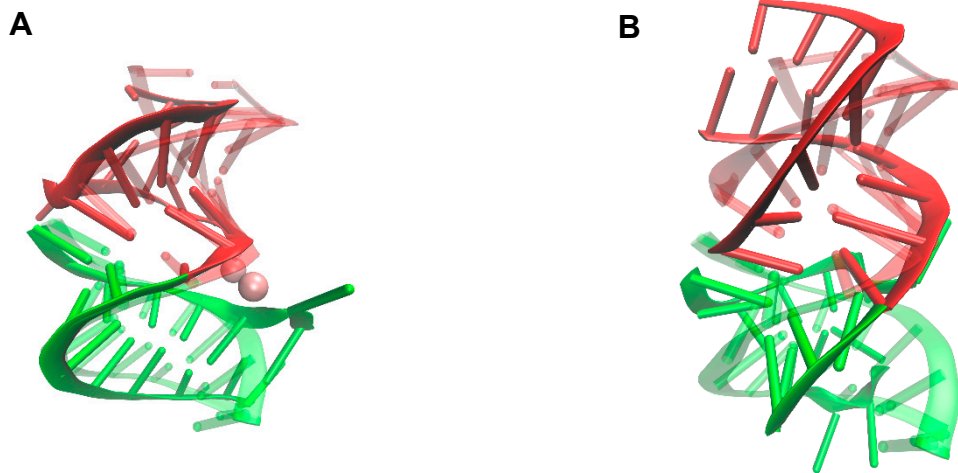

**Figure S2. The schematic representation of structural changes of H1-H3 at  $T = 400$  K.** (A) Representative snapshots of H1 (in red) and H3 (in green) in Mg-bound 3WJ-pRNA. (B) Representative snapshots of H1 and H3 in Mg-free 3WJ-pRNA. The initial structures are shown in transparent and the final structures are shown in normal color.

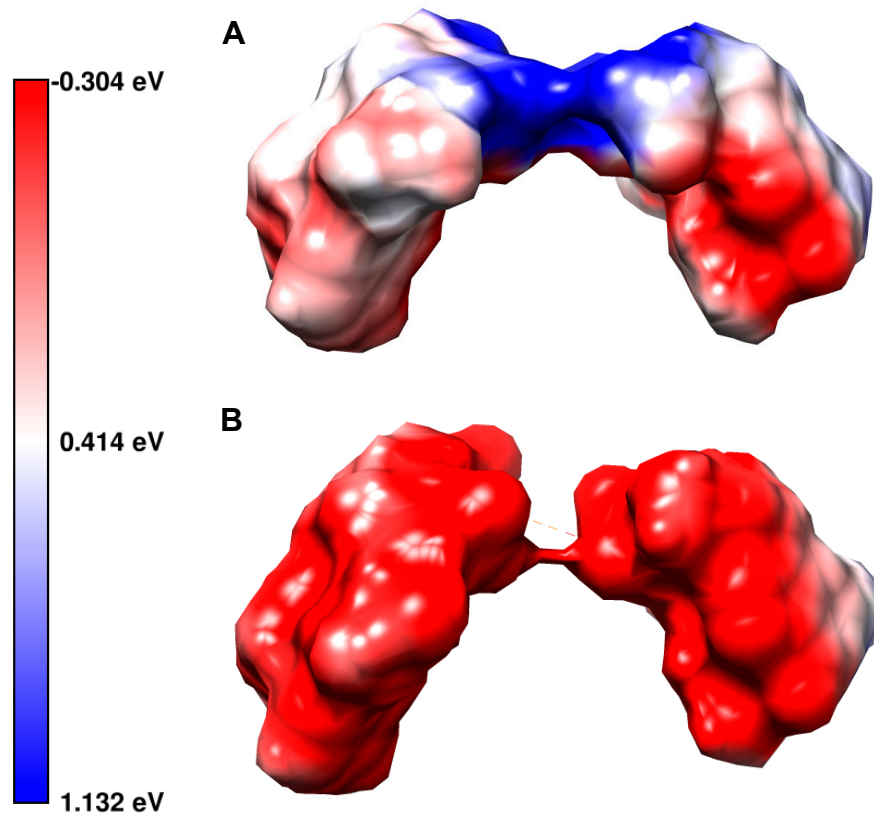

**Figure S3.  $\text{Mg}^{2+}$  ions compensate the negative charges in 3WJ-pRNA backbone and reduce electrostatic repulsion.** (A) Electrostatic potentials of four bases which constitute the Mg clamps, i.e., 3G, 4C of H1 and 6A, 7A of H3, in Mg-bound 3WJ-pRNA. (B) Electrostatic potentials of these bases in Mg-free 3WJ-pRNA.

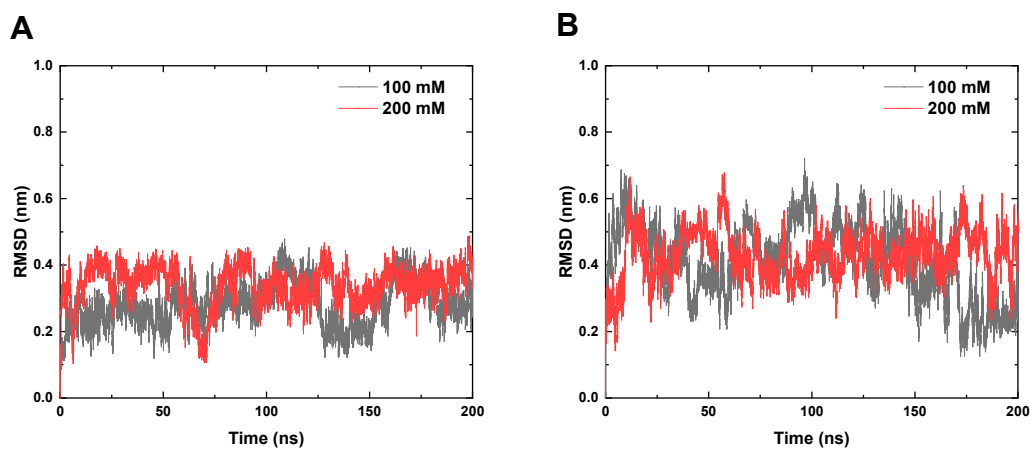

**Figure S4. The RMSDs of the core region in (A) Mg-bound and (B) Mg-free 3WJ-pRNA in varying concentrations of NaCl solutions at  $T = 300$  K.**

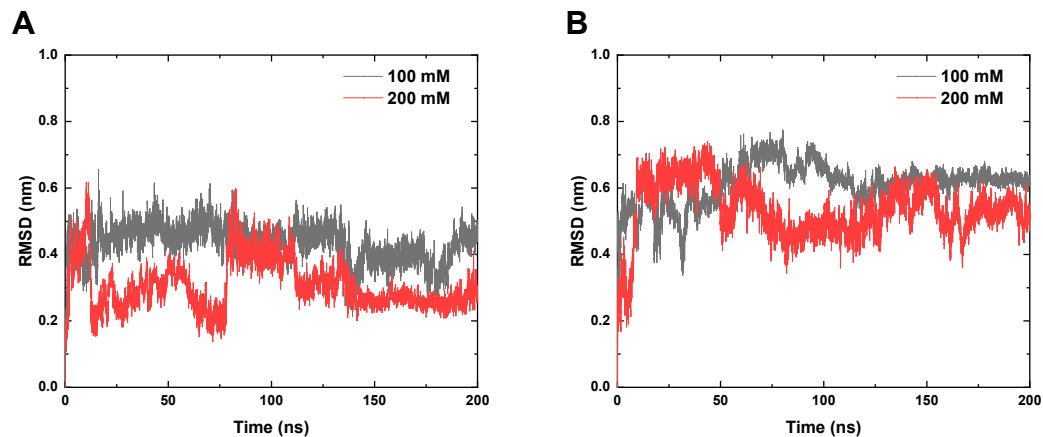

**Figure S5.** The RMSDs of the core region in (A) Mg-bound and (B) Mg-free 3WJ-pRNA in varying concentrations of NaCl solutions at  $T = 400$  K.

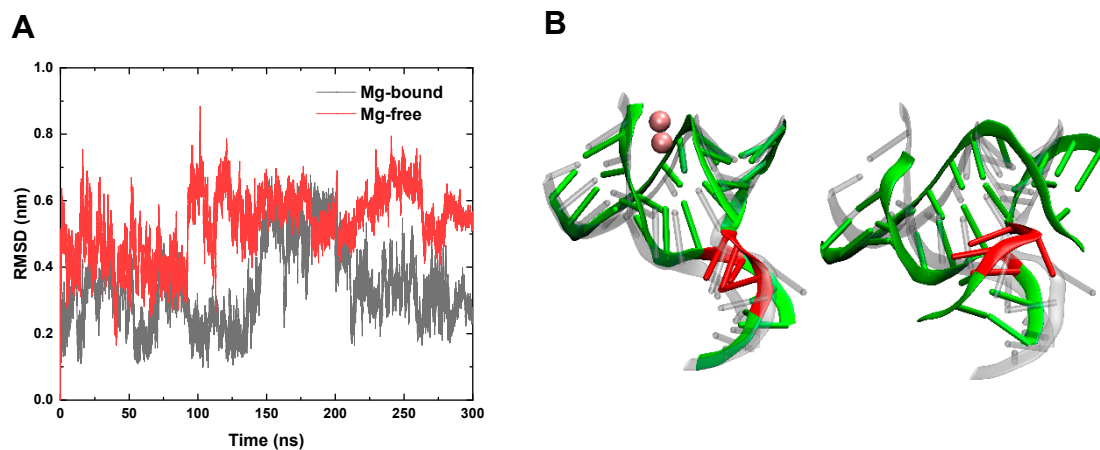

**Figure S6.** The structural characterizations of the core region in both Mg-bound and Mg-free systems at  $T = 370$  K. (A) The RMSDs of the core region in Mg-bound (black) and Mg-free (red) 3WJ-pRNA with respect to the initial structure. (B) Representative snapshots of the core region in the Mg-bound (left panel) and the Mg-free (right panel) 3WJ-pRNA. The initial structures are shown in transparent and the final structures are shown in normal color.

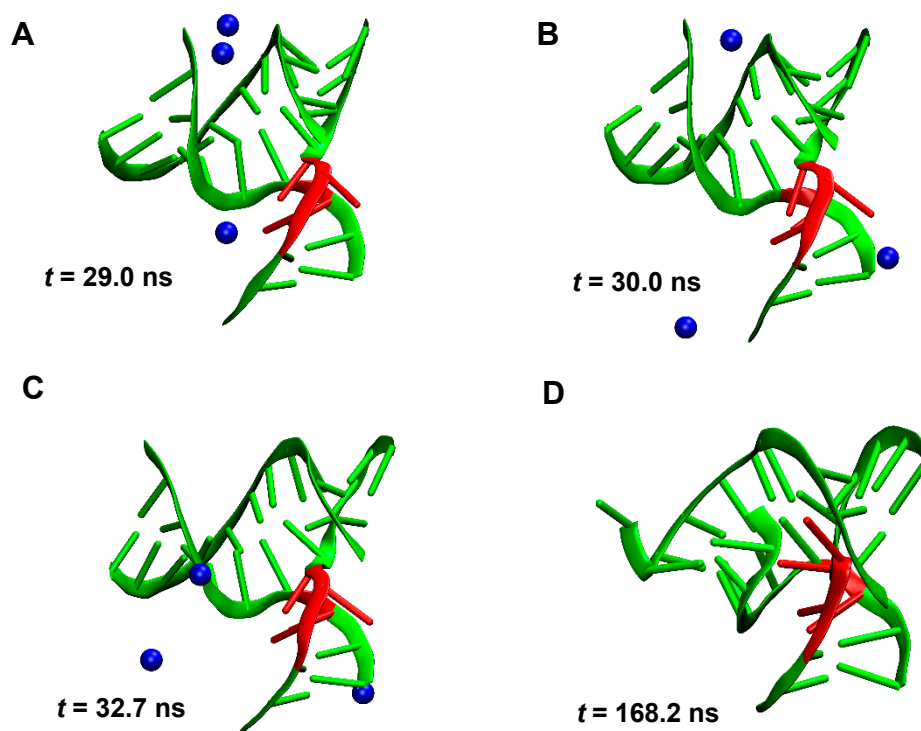

**Figure S7. Na<sup>+</sup> ions cannot bind with 3WJ-pRNA stably.** (A, B, C and D) Representative snapshots of possible binding of Na<sup>+</sup> ions to Mg-free 3WJ-pRNA at  $t = 29.0$ ,  $30.0$ ,  $32.7$  and  $168.2$  ns under high temperature ( $T = 400$  K).
